# Supplementary material for: Antidiabetic (type 2) effects of Lactobacillus G15 and Q14 in rats through regulation of intestinal permeability and microbiota
Source: Royal Society of Chemistry journal article supplement (doi:10.1039/c6fo00831c), 2016-01-01
Supplement: c6fo00831c1.pdf [file c6fo00831c1.pdf]

## Supplementary materials

### 1. Results

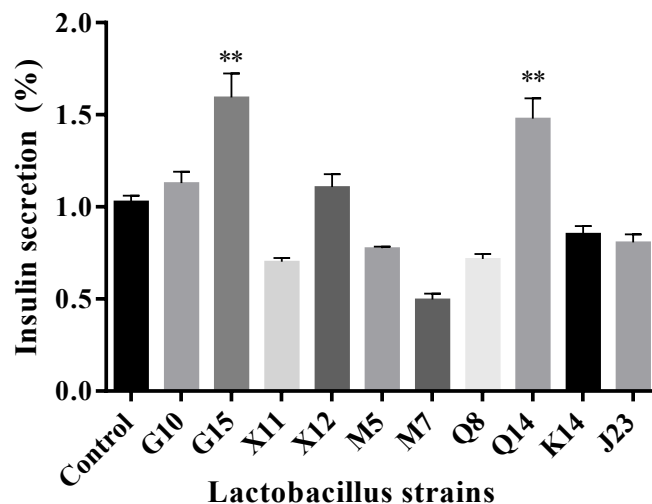

**Fig. 1** Glucose-stimulated insulin secretion after treated with different lactobacillus. (\*\* $P < 0.01$  compared with the Control). *Lactobacillus* G15 and Q14 significantly improved the insulin secretion of glucose-stimulated INS-1 cells. We assumed that the strains had a hypoglycemic potential.

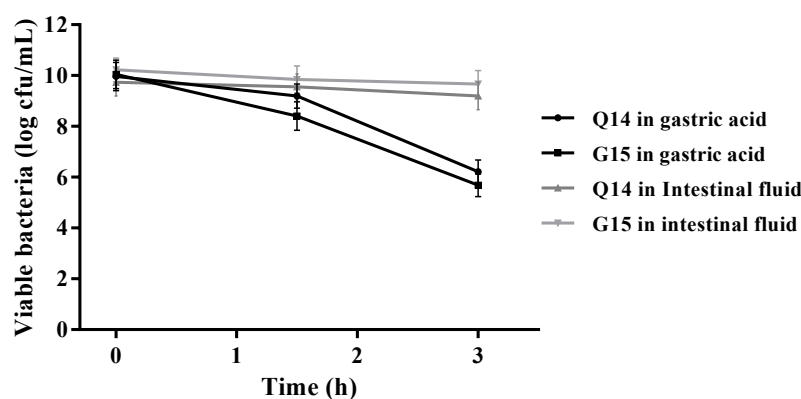

**Fig. 2** Tolerance to gastric acid and intestinal fluid of *Lactobacillus* G15 and Q14. The survival of bacteria cells in gastric acid and intestinal fluid in vitro predicted the actual in vivo survival of the strains when consumed in a non-protected way.

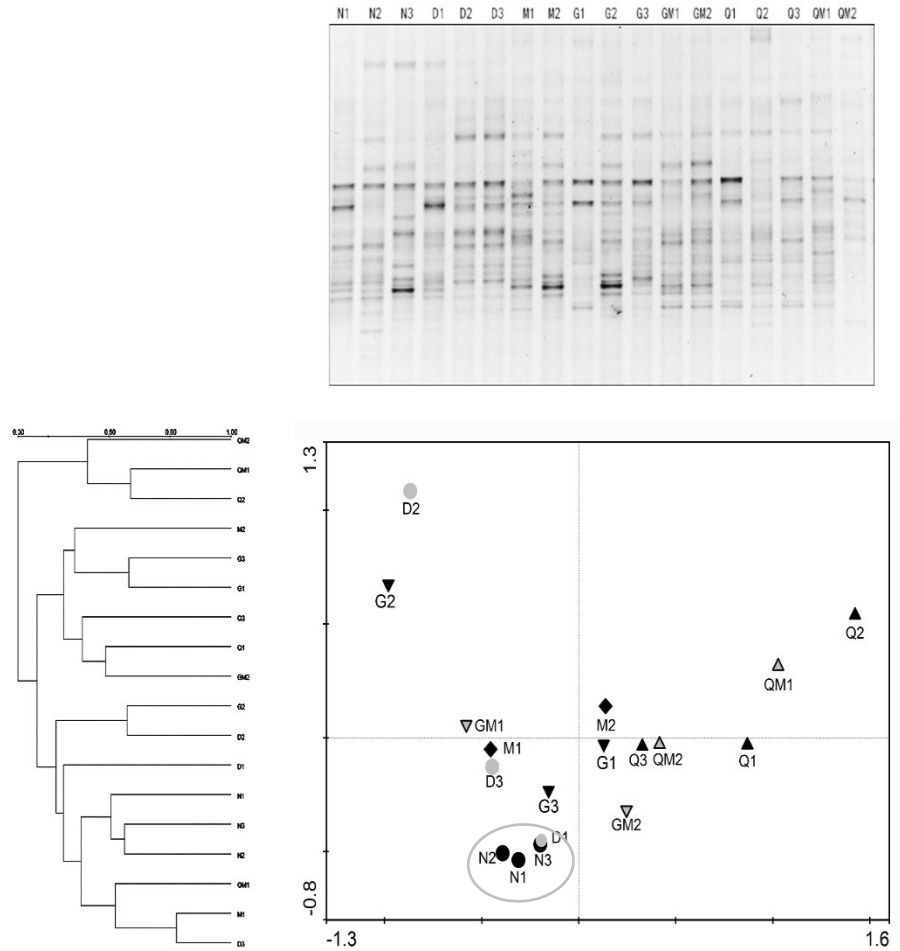

**Fig. 3** HFD induced the gut microbiota disturbance. Stool samples were randomly collected in week 6 (after HFD manipulation and before treatment) for baseline, to evaluate the regulation of gut microbiota by different treatments. HFD resulted in disorganized gut microbiota in contrast with the N group.

## 2. Material and methods

### 2.1 The glucose-stimulated insulin secretion (GSIS) test

In brief, we chose 10 lactobacillus strains isolated from traditional food by our lab previously, after grown anaerobically in MRS medium at 37°C for 18-36 h, the bacteria were collected by centrifugation and washed twice with phosphate-buffered saline (PBS). The cells were counted and suspended in PBS at  $10^9$  cfu·mL<sup>-1</sup>. Then the bacteria cells were sonicated for 15 min at 120 kW and centrifuged at 2000 g for 10 min. Supernatants containing crude cell wall extracts were sterilized using 0.45 μm filter and kept at -20°C.<sup>1</sup>

To assay insulin secretion, INS-1 cells (insulin secreting cell line, provided by the Cancer Institute of the Chinese Academy of Medical Science, Beijing, China) were seeded at  $3.5 \times 10^5$  cells/well in 12-well tissue culture dishes. After 72 h of pre-incubation in RPMI-1640 medium with bacteria cell-free extract (15 %), the cells were washed with PBS twice. Insulin secretion was measured after a static incubation for 2 h in 2mL RPMI-1640 medium containing glucose (16.7 mmol/L), insulin released into

the supernatants was measured using an ELISA kit (Jiancheng Bioengineering Institute, Nanjing, China).

## **2.2 The gastric acid and intestinal fluid tolerance test**

Briefly, bacteria cells from overnight (18 h) lactobacillus cultures were harvested (10 000 g, 5 min) and re-suspended in PBS solution, pH 2.0, containing 3 mg·mL<sup>-1</sup> pepsin (Sigma Chemical Co., MO, USA), and in PBS solution, pH 8.0, containing 1 mg·mL<sup>-1</sup> pancreatin and 0.45% bile salts (Sigma Chemical Co., MO, USA). Initial populations ranged from 9.7 to 10.2 log cfu·mL<sup>-1</sup>. Resistance was assessed in terms of viable colony counts and enumerated after incubation at 37°C for 0, 1.5 and 3 h, which reflecting the time spent of food in the stomach and small intestine.<sup>2</sup>

## **Reference**

1. S. H. Kim, C. S. Huh, I. D. Choi, J. W. Jeong, H. K. Ku, J. H. Ra, T. Y. Kim, G. B. Kim, J. H. Sim and Y. T. Ahn, *Journal of applied microbiology*, 2014, 117, 834-845.
2. P. A. Maragkoudakis, G. Zoumpopoulou, C. Miaris, G. Kalantzopoulos, B. Pot and E. Tsakalidou, *International Dairy Journal*, 2006, 16, 189-199.
